# Supplementary material for: Identifying Targeted Therapies for CBFA2T3::GLIS2 Acute Myeloid Leukemia
Source: Research Square preprint supplement (doi:10.21203/rs.3.rs-6528748/v1), 2025-05-13

**FIGURE S7****A****CMS parental**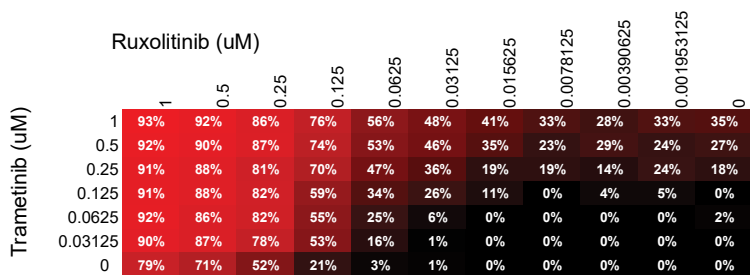

Legend: Fractional inhibition (%)

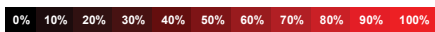**CMS resistant**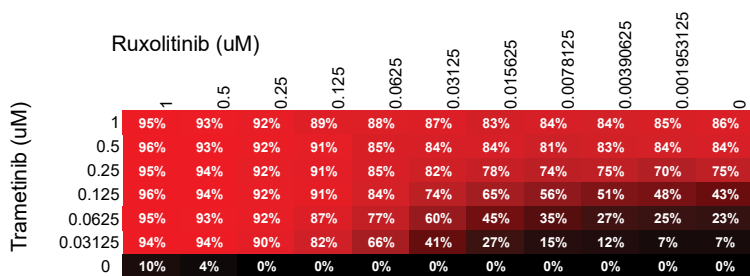

Legend: Fractional inhibition (%)

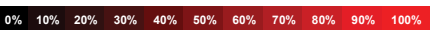**M-07e parental**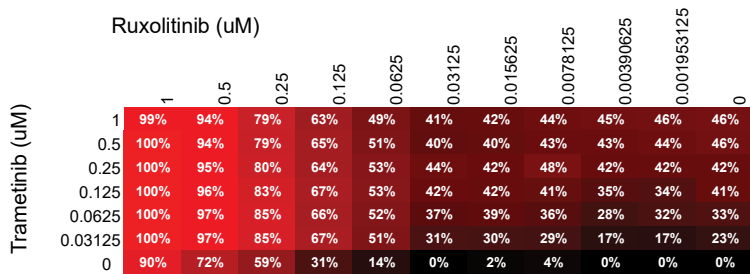

Legend: Fractional inhibition (%)

**M-07e resistant**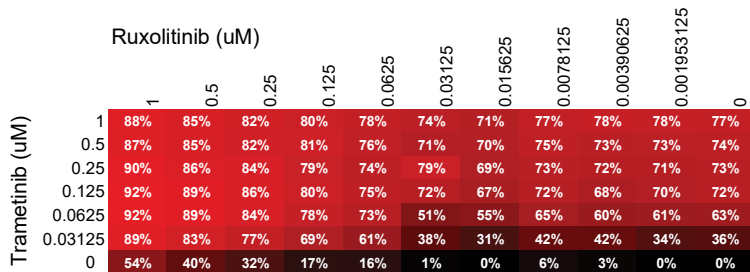**B**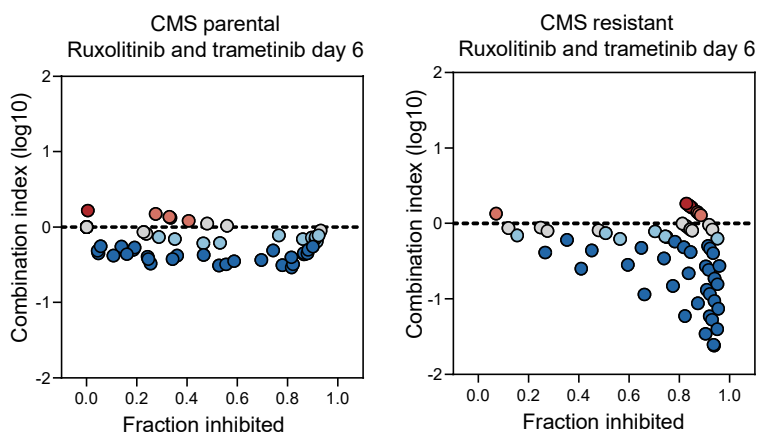

- Strong synergy
- Synergy
- Additivity
- Antagonism
- Strong antagonism

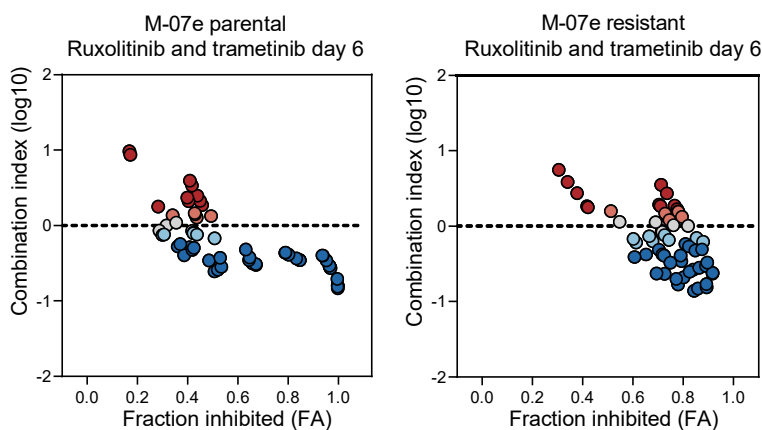**C**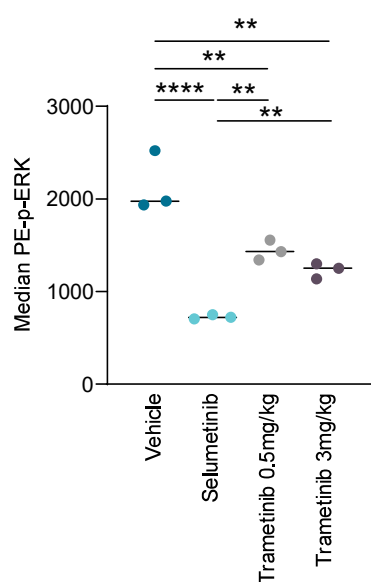

Supplement: Supplementary file 1 [file 5de7cccab2f0275d35408083.pdf]
